1 **Fertility care among people with primary ciliary dyskinesia**

2 **Authors**

3 Leonie D Schreck<sup>1,2</sup>, Myrofora Goutaki<sup>1,3</sup>, Philippa Jörger<sup>1</sup>, Katie Dexter<sup>4</sup>, Michele  
4 Manion<sup>5</sup>, Sophie Christin-Maitre<sup>6</sup>, Bernard Maitre<sup>7,8</sup>, COVID-PCD patient advisory  
5 group<sup>#</sup>, Claudia E Kuehni<sup>1,3¶</sup>, Eva SL Pedersen<sup>1\*¶</sup>

6 **Affiliations**

7 1, Institute of Social and Preventive Medicine, University of Bern, Bern, Switzerland.  
8 2, Graduate School for Health Sciences, University of Bern, Bern, Switzerland.  
9 3, Division of Paediatric Respiratory Medicine and Allergology, Department of  
10 Paediatrics, Inselspital, University Hospital, University of Bern, Bern, Switzerland.  
11 4, PCD Support UK, London, United Kingdom.  
12 5, PCD Foundation, Minneapolis, USA.  
13 6, Sorbonne University, INSERM UMR 933, 75012 Paris, France.  
14 7, Univ Paris Est-Créteil, Faculté de Santé, INSERM, IMRB, Créteil, France.  
15 8, Pulmonary Department, Centre Hospitalier Intercommunal de Créteil, France.

16

17 \*Corresponding author:

18 Eva Sophie Lunde Pedersen, Institute of Social and Preventive Medicine, University  
19 of Bern, Switzerland. Mittelstrasse 43, 3012 Bern, Switzerland.

20 Email: [eva.pedersen@unibe.ch](mailto:eva.pedersen@unibe.ch), Tel: +41 684 56 75

21 ¶These authors contributed equally to this work.

22

23 # COVID-PCD patient advisory group (in alphabetical order):

24 Sara Bellu, Associazione italiana Discinesia Ciliare Primaria Sindrome di Kartagener

25 Onlus Italy; Isabelle Cizeau, Association ADCP, France; Fiona Copeland, PCD

26 Support UK; Katie Dexter, PCD Support UK; Lucy Dixon, PCD Support UK; Trini

27 López Fernández, Asociación Española de Pacientes con Discinesia Ciliar Primaria,

28 Spain; Susanne Grieder, Selbsthilfegruppe Primäre Ciliäre Dyskinesie, Switzerland;

29 Catherine Kruljac, PCD Australia Primary Ciliary Dyskinesia, Australia; Michele

30 Manion, PCD Foundation, USA; Bernhard Rindlisbacher, Selbsthilfegruppe Primäre

31 Ciliäre Dyskinesie, Switzerland; Hansruedi Silberschmidt, Verein Kartagener

32 Syndrom und Primäre Ciliäre Dyskinesie, Germany.

33

34 **Abstract**

35 **Introduction:** Fertility care is important for people living with primary ciliary  
36 dyskinesia (PCD) who are at increased risk of fertility problems. We investigated  
37 fertility care in an international participatory study.

38 **Methods:** Participants of the COVID-PCD study completed an online questionnaire  
39 addressing fertility issues. We used logistic regression to study factors associated  
40 with fertility specialist visits.

41 **Results:** Among 384 respondents (response rate 53%), 266 were adults [median  
42 age 44 years, interquartile range (IQR) 33–54), 68% female], 16 adolescents, and  
43 102 parents of children with PCD. Half adult participants (128; 48%) received care  
44 from fertility specialists at a median age of 30 years (IQR 27–33)—a median of 10  
45 years after PCD diagnosis. Fertility specialist visits were reported more often by  
46 adults with pregnancy attempts [odds ratio (OR) 9.1, 95% confidence interval (CI)  
47 3.8–23.6] and among people who reported fertility as important for them (OR 5.9,  
48 95% CI 2.6–14.6) and less often by females (OR 0.4, 95% CI 0.2–0.8). Only 56% of  
49 participants who talked with healthcare professionals about fertility were satisfied  
50 with information they received. They expressed needs for more comprehensive  
51 fertility information and reported dissatisfaction with physician knowledge about PCD  
52 and fertility.

53 **Conclusion:** People with PCD are inconsistently referred to fertility specialists. We  
54 recommend care from fertility specialists become standard in routine PCD care, and  
55 that PCD physicians provide initial fertility information either at diagnosis or no later  
56 than transition to adult care.

57

58 **Manuscript**

59 **Introduction**

60 Fertility care is important for people living with primary ciliary dyskinesia (PCD) who  
61 are at increased risk of fertility problems. PCD is a rare genetic disease which affects  
62 the function and structure of motile cilia. Motile cilia are found in the respiratory tract,  
63 fallopian tubes, and efferent ductules<sup>1,2</sup>. In addition, sperm flagella share common  
64 structures with motile cilia<sup>3</sup>. In females, it was hypothesized the abnormal motion of  
65 cilia in fallopian tubes possibly leads to infertility and more ectopic pregnancies<sup>1,4,5</sup>.  
66 Male infertility is likely caused by reduced sperm count in ejaculate from altered  
67 motility of cilia in the efferent ductules or by dysmotile sperm<sup>2,3,6</sup>. However, the  
68 extent of fertility problems—especially among females—is unknown<sup>7</sup>.

69 Fertility care is defined as interventions that include fertility awareness, support and  
70 fertility management<sup>8</sup>. Patients with PCD would benefit from fertility care as it  
71 provides information for making informed decisions about reproductive health. If  
72 needed, assisted reproduction interventions, such as *in vitro* fertilization with or  
73 without intracytoplasmic sperm injections, could be offered early on to increase  
74 chances of pregnancy. However, no clear guidelines currently exist for integrating  
75 fertility care into routine PCD care. Recommendations about fertility care are scarce  
76 and imprecise<sup>9-15</sup>. It is unclear how fertility care is implemented into routine PCD  
77 care, what information is provided and when, and whether people with PCD are  
78 satisfied with fertility information they receive. For cystic fibrosis (CF)—another rare  
79 genetic lung disease—fertility issues are also present among most males and some  
80 females. Studies about CF and reproductive health suggest adults, adolescents, and  
81 parents of children with CF know about the possibility of fertility problems, yet lack

82 important CF-specific reproductive health information<sup>16-20</sup>. CF and reproductive  
83 health studies share clear recommendations for standardized education about  
84 reproductive health<sup>16,21</sup>.

85 Using data from the largest study worldwide collecting information directly from  
86 people with PCD (COVID-PCD), we studied fertility care among people with PCD,  
87 including their sources of and factors for referrals to fertility specialists and  
88 satisfaction with fertility information received.

## 89 **Methods**

### 90 **Study design and ethics**

91 We obtained study data from a cross-sectional questionnaire about fertility nested  
92 within the COVID-PCD study. COVID-PCD is an international participatory cohort  
93 study that collects information directly from people with PCD (clinicaltrials.gov:  
94 NCT04602481). A detailed study protocol has been published<sup>22</sup>. In brief, the  
95 COVID-PCD study was set up in 2020 at the University of Bern, Switzerland in  
96 collaboration with international PCD patient support groups to follow people with  
97 PCD through the pandemic and answer other PCD-related research questions. The  
98 COVID-PCD study enrolls participants of any age with PCD from all over the world  
99 with suspected or confirmed PCD diagnoses. The study is online, anonymous, and  
100 longitudinal. Questionnaires are available in five languages (English, French,  
101 German, Italian, and Spanish).

102 The cantonal ethics committee of Bern approved the study (study ID: 2020-00830).  
103 We obtained informed consent either from participants or parents of participants  
104 younger than age 14. We report according to strengthening the reporting of  
105 observational studies in epidemiology (STROBE) recommendations<sup>23</sup>.

## 106 **Study procedures**

107 Participants registered via the study website ([www.covid19pcd.ispm.ch](http://www.covid19pcd.ispm.ch)) and  
108 received a baseline questionnaire, then weekly follow-up questionnaires. We sent a  
109 fertility questionnaire by email on July 12, 2022 to all participants enrolled in the  
110 COVID-PCD study. We sent up to three reminders if participants did not yet  
111 complete the questionnaire. We collected responses until March 8, 2023. All data  
112 was entered directly in a web-based database using the Research Electronic Data  
113 Capture (REDCap) platform <sup>24</sup> hosted by the Swiss medical registries and data  
114 linkage center (SwissRDL) at the University of Bern.

## 115 **Fertility questionnaire**

116 We developed the fertility questionnaire based on existing literature, and we  
117 discussed it with fertility specialists and patient representatives from PCD support  
118 groups. We include questions and answer categories in Supplementary Table S1.  
119 We developed separate questionnaires for adults older than 18 years, adolescents  
120 ages 14–17 years, and parents of children with PCD younger than 14 years. Native  
121 speaking members from patient support groups or our research team translated  
122 questionnaires; two research team members independently checked translations.

## 123 **Information on fertility care characteristics**

124 In the adult questionnaire, we asked participants if ever referred to fertility  
125 specialists; if so, at what age and who provided referrals. We calculated time until  
126 fertility specialist visit as the difference between age at PCD diagnosis (or age 18 for  
127 people diagnosed during childhood) and age at fertility specialist visit. We excluded

128 adults who were diagnosed with PCD only after fertility specialist visits or with  
129 unreported ages at PCD diagnosis or at fertility specialist visit.

130 We asked all participants (adults, adolescents, and parents) their opinions about the  
131 need for fertility care, their fertility information seeking behaviors, and sources of  
132 fertility information they used. Among participants who previously talked with  
133 healthcare professional about fertility, we asked about what topics were discussed  
134 and whether they were satisfied with fertility information they received. We asked  
135 participants who reported they were either partly satisfied or unsatisfied with  
136 provided fertility information to pinpoint information gaps.

137 We studied how fertility care from fertility specialists differed by age and country. For  
138 adults, age at survey, age at diagnosis, and age at fertility specialist visit were  
139 categorized as either 18–30 years, 31–45 years, or older than 45 years. We chose  
140 age groups according to physiological female fertility changes with peak reproductive  
141 years between late teens and late 20s; declining fertility starting by age 30 and by  
142 age 45, fertility declining so much pregnancy without medical assistance is unlikely  
143 for most females <sup>25</sup>. For simplicity, we used the same age groups for males. We  
144 categorized country of residence. We combined Canada and the United States as  
145 North America because their PCD care is organized in a network. We included  
146 England, Northern Ireland, Scotland, and Wales as the United Kingdom. We grouped  
147 countries with fewer than 25 participants into either “other European countries” or  
148 “other non-European countries” (Supplementary Table S2).

## 149 **Data analysis**

150 We described fertility care separately for females and males. We compared time  
151 from diagnosis (or age 18 for people diagnosed during childhood) until fertility

152 specialist visit between females and males using Mann Whitney U test. We studied  
153 factors associated with fertility specialist visits using multivariable logistic regression  
154 with sex, age at survey, age at PCD diagnosis, pregnancy attempt, and self-  
155 assessed importance of fertility as explanatory variables. For the regression  
156 analysis, we excluded people with missing values for age at PCD diagnosis and  
157 without information on pregnancy attempts. Each variable had <5% missing data.  
158 We used R version 4.2.0 for all analyses <sup>26</sup>.

## 159 **Results**

### 160 **Study population**

161 In total, 384 of 723 COVID-PCD participants (response rate 53%) completed the  
162 fertility questionnaire (Supplementary Table S3). Of these, 266 were adults (69%)  
163 with a median age of 44 years [interquartile range (IQR) 33–54]; 16 adolescents  
164 (4%), and 102 parents of children with PCD (27%). Two-thirds of adult participants  
165 were female (181; 68%). Most participants were from North America (71; 18%), the  
166 United Kingdom (66; 17%), and Germany (62; 16%). Compared with non-  
167 participants, people who completed the fertility questionnaire were older and more  
168 often living in Germany, Switzerland, Australia, and other European countries  
169 (Supplementary Table S3).

### 170 **Fertility care among adults**

171 Half of adult participants (128; 48%) reported receiving fertility care from fertility  
172 specialists before completing the survey (Table 1) with a higher proportion of males  
173 (47; 55%) than females (81; 45%). The median age at fertility specialist visit was 30  
174 years (IQR 27–33). Only 15 (12%) participants were referred by their PCD  
175 physicians, while most participants either reported referrals by non-PCD physicians



176 (46; 36%) or organized appointments themselves (43; 34%) (Table 1). The median  
177 time between PCD diagnosis (or age 18 for people diagnosed during childhood) and  
178 fertility specialist visit was 10 years, and higher among females (11 years, IQR 7–13)  
179 than males (7.5 years, IQR 0–14) (p-value 0.06).

180 Adults who received fertility care from fertility specialists were less often female  
181 [odds ratio (OR) 0.4, 95% confidence interval (CI) 0.2–0.8], more often reported prior  
182 pregnancy attempts (OR 9.1, 95% CI 3.8–23.6) and fertility as an important issue  
183 (OR 5.9, 95% CI 2.6–14.6) (Table 2). The proportion of people who reported fertility  
184 care from fertility specialists differed between countries with the highest in France  
185 (11; 69%) and lowest in Italy (7; 35%).

186 Most participants (370; 96%) felt people with PCD should be referred for fertility care  
187 by fertility specialists (Table 3), yet opinions about the timing of fertility care differed.  
188 More than one-third (144; 38%) reported everyone should be referred; many (102;  
189 27%) thought only people who want children should be referred; some (78; 20%) felt  
190 only adults and few (37; 10%) reported only people with unsuccessful pregnancy  
191 attempts should be referred.

## 192 **Fertility information among all participants**

193 Most participants (277; 72%) searched for information about fertility (Table 3). They  
194 mostly searched multidisciplinary PCD network websites (119; 43%) or scientific  
195 articles (92; 33%). Around half (203; 53%) of all participants talked about fertility with  
196 healthcare professionals involved in their PCD care prior to the study, with adult  
197 females (108; 60%) and adult males (61; 72%) more often than parents of children  
198 (32; 31%) and adolescents (2; 13%) with PCD (Table 3). Participants reported most  
199 healthcare professionals mentioned people with PCD may have problems with

200 fertility (females: 97; 90%, males: 53; 87%, parents: 30; 94%) (Figure 1). More than  
201 half of adult participants received information about the possibility of fertility  
202 treatments (females: 67; 62%, males: 33; 54%) and one-quarter (females: 31; 29%,  
203 males: 16; 26%) were informed about fertility awareness factors other than PCD  
204 influencing fertility, such as advanced age or lifestyle factors. Overall, half of  
205 participants (111; 56%) were satisfied with information from healthcare  
206 professionals, ranging from fewer than half of females (49; 45%) to three-quarters of  
207 males (43; 72%) (Figure 2). Participants who reported dissatisfaction with fertility  
208 information noted information gaps, such as detailed information about effects from  
209 PCD on fertility (18; 20%), effects on female fertility specifically (8; 9%) or  
210 information and advice on fertility treatments (9; 10%). They reported dissatisfaction  
211 with physician knowledge about PCD and fertility (16; 18%). Eight participants  
212 reported fertility was not yet relevant because the person diagnosed with PCD was  
213 young; and five reported long ago PCD-fertility discussions with little known about  
214 PCD at the time of the conversation (Table 4).

## 215 **Discussion**

### 216 **Summary of findings**

217 In the first study on fertility care among people with PCD, we showed only 48% of  
218 adults with PCD reported ever visiting fertility specialists with a median delay of 10  
219 years since diagnosis (or age 18 for people diagnosed during childhood). Only 12%  
220 were referred to fertility specialists by their PCD physician. Among participants with  
221 PCD who spoke with healthcare professional about fertility, only 56% reported  
222 satisfaction with provided information. They expressed needs for more

223 comprehensive fertility information, such as detailed information about effects from  
224 PCD on fertility.

### 225 **Strengths and weaknesses**

226 Using data from the largest study with patient-reported data in PCD, we collected  
227 information about fertility care and opinions from people with PCD. Above all, our  
228 results represent relevance for people with PCD. Since we conducted our study  
229 online and anonymously, we involved people normally with limited involvement in  
230 research from many countries around the world.

231 Our study also has limitations. People who talked with healthcare professionals  
232 about fertility long ago possibly found it difficult to recall conversation details, which  
233 could lead to recall bias. However, we did not ask detailed questions about fertility  
234 discussions; instead, we focused on general aspects and opinions. Therefore, we  
235 expected respondents to remember the main points discussed. Fertility is a sensitive  
236 topic and people with negative fertility care experiences possibly participate more as  
237 an opportunity to make themselves heard, which could lead to selection bias.

### 238 **Comparison with other studies**

239 To our knowledge, no other study investigated fertility care among people with PCD.  
240 Review papers on managing PCD suggest including fertility topics in routine PCD  
241 care <sup>10,15</sup>. The PCD Foundation recommends including reproductive medicine “as  
242 clinically needed” <sup>9</sup>; Werner et al. note “infertility is managed with adequate  
243 reproductive techniques” <sup>14</sup>; and Lucas et al. suggest integrating fertility care at  
244 transition into adult care <sup>13</sup>. For male infertility, two reviews promote including fertility  
245 care during the transition from pediatric to adult care <sup>27 3</sup>. However, none explicitly

246 counsel how and when fertility care should be included; how it should be organized;  
247 and what topics should be addressed <sup>7</sup>. In CF research, recent reproductive health  
248 reviews address some of these questions and propose management strategies for  
249 healthcare professionals <sup>21,28-31</sup>. However, data on fertility care implementation show  
250 reproductive health needs are not proactively addressed among people with CF <sup>32</sup>.  
251 Adults and adolescents with CF report inadequate communication on the topic from  
252 CF care providers <sup>17,18</sup> and delayed introduction of reproductive health education <sup>16</sup>.  
253 Only 30% of parents of children with CF were satisfied with their current knowledge  
254 of reproductive health <sup>20</sup>. Results from our study confirm people with PCD face  
255 similar challenges in terms of fertility care and highlight important gaps in PCD care  
256 and existing recommendations.

### 257 **Interpretation of results**

258 Young adults with PCD are not referred to fertility specialists as part of routine PCD  
259 care. Most seem only to be referred when experiencing fertility problems, and usually  
260 at their own request. Females are referred later than males, although an early visit  
261 would be even more important for them since their fertility declines earlier. This  
262 suggests fertility care is not satisfactorily integrated in routine PCD care and potential  
263 fertility problems are not proactively addressed before becoming relevant to people  
264 with PCD. Only one-quarter of participants were informed by healthcare  
265 professionals about other fertility awareness factors, such as age, influencing fertility;  
266 only half of participants were informed about the possibility of fertility treatments. Our  
267 results also suggest great dissatisfaction among people with PCD regarding their  
268 fertility care. Most participants expressed a need for more comprehensive  
269 information about fertility for people with PCD. This also reflects the general lack of

270 knowledge regarding fertility issues among people with PCD—especially in  
271 females—and indicates a need for further research. Until this knowledge gap is filled,  
272 fertility care will have limitations.

273 PCD physicians may not recognize the need to address fertility as it is out of their  
274 area of expertise. Nevertheless, it is likely beneficial for PCD physicians to openly  
275 discuss potential fertility issues. Already at diagnosis, PCD physicians can provide  
276 information about potential impact from PCD on fertility and—no later than the  
277 transition to adult care—offer information about fertility awareness, such as age or  
278 timing of sexual intercourse. By integrating fertility care, physicians could mention  
279 ways to increase chances of pregnancy through fertility treatments and interventions,  
280 offer further fertility information, and organize referrals to fertility specialists if  
281 needed.

## 282 **Conclusion**

283 People with PCD are inconsistently referred to fertility specialists and report  
284 difficulties obtaining satisfactory fertility information. We recommend care from  
285 fertility specialists become standard in routine PCD care, and PCD physicians  
286 provide initial fertility information either at diagnosis or no later than transition to adult  
287 care.

288 **Declarations**

289 **Acknowledgments**

290 We thank all participants and their families, and we thank the PCD support groups  
291 and physicians who advertised the study. We thank our collaborators who helped set  
292 up the COVID-PCD study: Cristina Ardura, Yin Ting Lam, Christina Mallet, Helena  
293 Koppe, Dominique Rubi from the University of Bern and Jane S Lucas and Amanda  
294 Harris from the University Hospital Southampton. We thank Nathalie Massin and  
295 Lara Gonçalves Pissini for their help in the design of the fertility questionnaire. We  
296 thank Kristin Marie Bivens for her editorial work and guidance on our manuscript.

297 **Ethics approval and consent to participate**

298 Bern Cantonal Ethics Committee (Kantonale Ethikkommission Bern) approved our  
299 study (Study ID: 2020-00830). Participants provide their informed consent to  
300 participate in the study at registration. Participation is anonymous. Participants can  
301 withdraw consent to participate at any time by contacting the study team.

302 **Funding**

303 Our research was funded by the Swiss National Science Foundation, Switzerland  
304 (SNSF 320030B\_192804/1), the Swiss Lung Association, Switzerland (2021-  
305 08\_Pedersen), and we also received support from the PCD Foundation, United  
306 States; the Verein Kartagener Syndrom und Primäre Ciliäre Dyskinesie, Germany;  
307 the PCD Support UK; and PCD Australia, Australia. M. Goutaki receives funding  
308 from the Swiss National Science Foundation (PZ00P3\_185923). Study authors  
309 participate in the BEAT-PCD Clinical Research Collaboration supported by the  
310 European Respiratory Society.

311 **Competing interests**

312 All authors declare no conflict of interest.

313 **Availability of data and materials**

314 COVID-PCD data is available upon reasonable request by contacting Claudia  
315 Kuehni ([claudia.kuehni@unibe.ch](mailto:claudia.kuehni@unibe.ch)).

316 **Authors' contributions**

317 LD Schreck, M Goutaki, CE Kuehni and ESL Pedersen made substantial  
318 contributions to the study concept and design. LD Schreck, M Goutaki, K Dexter, M  
319 Manion, S Christin-Maitre, B Maitre, Claudia E Kuehni and ESL Pedersen were  
320 involved in the design of the fertility questionnaire. LD Schreck analyzed data and  
321 drafted the manuscript. LD Schreck, ESL Pedersen, P Jörger, K Dexter, M Manion,  
322 S Christin-Maitre, B Maitre, M Goutaki, and CE Kuehni critically revised and  
323 approved the manuscript.

324

325 **Display items**

326 **Table 1:** Frequency of fertility specialist visits, age at visit, mode of referral, and time  
 327 until fertility specialist visit among adult females (n = 181) and males (n = 85) with  
 328 PCD (COVID-PCD study).

| <b>Adult participants who completed the fertility questionnaire</b> | <b>Overall</b> | <b>Female</b>  | <b>Male</b>   |
|---------------------------------------------------------------------|----------------|----------------|---------------|
|                                                                     | <b>n = 266</b> | <b>n = 181</b> | <b>n = 85</b> |
|                                                                     | <b>n (%)</b>   | <b>n (%)</b>   | <b>n (%)</b>  |
| <b>Have you ever visited a fertility specialist?</b>                |                |                |               |
| Yes                                                                 | 128 (48)       | 81 (45)        | 47 (55)       |
| No, but I have an appointment                                       | 6 (2)          | 5 (3)          | 1 (1)         |
| No, but I would like to                                             | 14 (5)         | 12 (7)         | 2 (2)         |
| No                                                                  | 118 (44)       | 83 (46)        | 35 (41)       |
| <b>Adult participants who visited fertility specialists</b>         | <b>n = 128</b> | <b>n = 81</b>  | <b>n = 47</b> |
| Age at fertility specialist visit                                   |                |                |               |
| Median (IQR)                                                        | 30 (27–33)     | 29 (27–32)     | 30 (28–35)    |
| 18–30 y                                                             | 74 (58)        | 50 (62)        | 24 (51)       |
| 31–45 y                                                             | 53 (41)        | 30 (37)        | 23 (49)       |
| Missing                                                             | 1 (1)          | 1 (1)          | 0 (0)         |
| Referral by PCD physician                                           | 15 (12)        | 5 (6)          | 10 (21)       |
| Referral by non-PCD physician                                       | 46 (36)        | 29 (36)        | 17 (36)       |
| Participant asked for referral                                      | 19 (15)        | 14 (17)        | 5 (11)        |
| Participant organized appointment                                   | 43 (34)        | 28 (35)        | 15 (32)       |
| Other <sup>a</sup>                                                  | 2 (2)          | 2 (2)          | 0 (0)         |
| Missing                                                             | 3 (2)          | 3 (4)          | 0 (0)         |
| <b>Time until fertility specialist visit<sup>b</sup></b>            | <b>n = 93</b>  | <b>n = 61</b>  | <b>n = 32</b> |
| Years, median (IQR)                                                 | 10 (6–13)      | 11 (7–13)      | 7.5 (0–14)    |

329 <sup>a</sup>Other answers included friend (n = 1), not specified (n = 1). <sup>b</sup>Calculated as the difference between the age at  
 330 PCD diagnosis (or age 18 for people diagnosed during childhood) and the age at fertility specialist visit. We  
 331 excluded participants when PCD was diagnosed only after fertility specialist visit (female n = 10; male n = 15) and  
 332 when age at diagnosis (female n = 9) or age at fertility specialist visit (female n = 1) were unreported. All  
 333 characteristics are presented as n and column %, unless otherwise stated. Abbreviations: IQR, interquartile  
 334 range. PCD, primary ciliary dyskinesia. y, years.

335



336 **Table 2:** Characteristics of adult participants and predictors of fertility specialist visit  
 337 (COVID-PCD study, n = 266).

|                                | <b>Fertility specialist visit</b> | <b>No fertility specialist visit</b> | <b>Univariable<sup>a</sup></b> | <b>Multivariable<sup>a</sup></b> |
|--------------------------------|-----------------------------------|--------------------------------------|--------------------------------|----------------------------------|
|                                | n = 128                           | n = 138                              | n = 266                        | n = 253                          |
|                                | n (%)                             | n (%)                                | OR (95% CI)                    | OR (95% CI)                      |
| <b>Sex</b>                     |                                   |                                      |                                |                                  |
| Male                           | 47 (55)                           | 38 (45)                              | 1.0                            | 1.0                              |
| Female                         | 81 (45)                           | 100 (55)                             | 0.7 (0.4–1.1)                  | 0.4 (0.2–0.8)                    |
| <b>Age at survey</b>           |                                   |                                      |                                |                                  |
| 18–30 y                        | 9 (19)                            | 39 (81)                              | 1.0                            | 1.0                              |
| 31–45 y                        | 55 (55)                           | 45 (45)                              | 5.3 (2.4–12.7)                 | 1.7 (0.6–5.2)                    |
| > 45 y                         | 64 (54)                           | 54 (46)                              | 5.1 (2.4–12.2)                 | 3.5 (1.04–12.1)                  |
| <b>Age at PCD diagnosis</b>    |                                   |                                      |                                |                                  |
| < 18 y                         | 67 (49)                           | 70 (51)                              | 1.0                            | 1.0                              |
| 18–30 y                        | 22 (46)                           | 26 (54)                              | 0.9 (0.5–1.7)                  | 0.7 (0.3–1.6)                    |
| 31–45 y                        | 21 (51)                           | 20 (49)                              | 1.1 (0.5–2.2)                  | 0.5 (0.2–1.2)                    |
| > 45 y                         | 9 (33)                            | 18 (67)                              | 0.5 (0.2–1.2)                  | 0.2 (0.05–0.6)                   |
| Missing                        | 9 (69)                            | 4 (31)                               |                                |                                  |
| <b>Pregnancy attempt</b>       |                                   |                                      |                                |                                  |
| No                             | 13 (14)                           | 78 (86)                              | 1.0                            | 1.0                              |
| Yes                            | 114 (66)                          | 60 (34)                              | 11.4 (6.0–23.0)                | 9.1 (3.8–23.6)                   |
| Missing                        | 1 (100)                           | 0 (0)                                |                                |                                  |
| <b>Importance of fertility</b> |                                   |                                      |                                |                                  |
| Not important                  | 12 (17)                           | 57 (83)                              | 1.0                            | 1.0                              |
| Important                      | 116 (59)                          | 81 (41)                              | 6.8 (3.5–14.0)                 | 5.9 (2.6–14.6)                   |
| <b>Countries/regions</b>       |                                   |                                      |                                |                                  |
| North America                  | 26 (51)                           | 25 (49)                              | 1.0                            |                                  |
| United Kingdom                 | 20 (40)                           | 30 (60)                              | 0.6 (0.3–1.4)                  |                                  |
| Germany                        | 20 (54)                           | 17 (46)                              | 1.1 (0.5–2.7)                  |                                  |
| Switzerland                    | 11 (42)                           | 15 (58)                              | 0.7 (0.3–1.8)                  |                                  |
| Italy                          | 7 (35)                            | 13 (65)                              | 0.5 (0.2–1.5)                  |                                  |
| France                         | 11 (69)                           | 5 (31)                               | 2.1 (0.7–7.5)                  |                                  |
| Australia                      | 7 (58)                            | 5 (42)                               | 1.3 (0.4–5.1)                  |                                  |
| Other European countries       | 23 (50)                           | 23 (50)                              | 1.0 (0.4–2.1)                  |                                  |
| Other countries                | 3 (38)                            | 5 (62)                               | 0.6 (0.1–2.6)                  |                                  |

338 <sup>a</sup>We compared people who reported fertility specialist visits with the group who reported no fertility specialist  
 339 visits. Multivariable model adjusted for sex, age at survey, age at PCD diagnosis, pregnancy attempt, and

340 importance of fertility. We excluded people with missing age at diagnosis and missing information about  
341 pregnancy attempt. All characteristics are presented as n and row % or as OR and 95% CI. Abbreviations: CI,  
342 confidence interval. OR, odds ratio. PCD, primary ciliary dyskinesia. y, year.

343 **Table 3:** Participant opinions on fertility care and their sources of fertility information  
 344 (COVID-PCD study, n = 384).

| <b>Participants who completed the fertility questionnaire</b>  | <b>Overall</b>  | <b>Female</b>   | <b>Male</b>    | <b>Adolescent</b> | <b>Parent of children</b> |
|----------------------------------------------------------------|-----------------|-----------------|----------------|-------------------|---------------------------|
|                                                                | <b>n = 384</b>  | <b>n = 181</b>  | <b>n = 85</b>  | <b>n = 16</b>     | <b>n = 102</b>            |
|                                                                | <b>n (%)</b>    | <b>n (%)</b>    | <b>n (%)</b>   | <b>n (%)</b>      | <b>n (%)</b>              |
| <b>Who should be referred to fertility specialists?</b>        |                 |                 |                |                   |                           |
| Everyone                                                       | 144 (38)        | 66 (36)         | 37 (44)        | 7 (44)            | 34 (33)                   |
| Only adults                                                    | 78 (20)         | 25 (14)         | 14 (16)        | 3 (19)            | 36 (35)                   |
| Only people who want children                                  | 102 (27)        | 54 (30)         | 25 (29)        | 5 (31)            | 18 (18)                   |
| Only people with unsuccessful pregnancy attempts               | 37 (10)         | 24 (13)         | 5 (6)          | 0 (0)             | 8 (8)                     |
| Other <sup>a</sup>                                             | 9 (2)           | 2 (1)           | 1 (1)          | 1 (6)             | 5 (5)                     |
| Nobody                                                         | 14 (4)          | 10 (6)          | 3 (4)          | 0 (0)             | 1 (1)                     |
| <b>I searched for information about fertility</b>              | <b>277 (72)</b> | <b>130 (72)</b> | <b>65 (76)</b> | <b>8 (50)</b>     | <b>74 (73)</b>            |
| Missing                                                        | 1 (0)           | 1 (1)           | 0 (0)          | 0 (0)             | 0 (0)                     |
| <b>Where did you search for information?</b>                   | <b>n = 277</b>  | <b>n = 130</b>  | <b>n = 65</b>  | <b>n = 8</b>      | <b>n = 74</b>             |
| PCD network websites                                           | 119 (43)        | 53 (41)         | 20 (31)        | 4 (50)            | 42 (57)                   |
| Scientific articles                                            | 92 (33)         | 47 (36)         | 20 (31)        | 1 (13)            | 24 (32)                   |
| Patient support groups/<br>patients with PCD                   | 88 (32)         | 43 (33)         | 13 (20)        | 1 (13)            | 31 (42)                   |
| Other websites                                                 | 87 (31)         | 41 (32)         | 13 (20)        | 4 (50)            | 29 (39)                   |
| Social media                                                   | 41 (15)         | 21 (16)         | 7 (11)         | 1 (13)            | 12 (16)                   |
| Friends/family                                                 | 17 (6)          | 11 (8)          | 4 (6)          | 2 (25)            | 0 (0)                     |
| Books                                                          | 6 (2)           | 3 (2)           | 2 (3)          | 0 (0)             | 1 (1)                     |
| <b>I talked about fertility with a healthcare professional</b> | <b>203 (53)</b> | <b>108 (60)</b> | <b>61 (72)</b> | <b>2 (13)</b>     | <b>32 (31)</b>            |

345 <sup>a</sup>Other answers included mid-late teens/reproductive age (n = 3), only if they want to (n = 4), children at an age  
 346 determined by parent/guardian (n = 1), not specified (n = 1). Abbreviation: PCD, primary ciliary dyskinesia. All  
 347 characteristics are presented as n and column %.

348  
 349  
 350  
 351  
 352

353 **Figure 1:** Topics covered in fertility discussions with the healthcare professional  
354 among females (n = 108), males (n = 60) and parents of children with PCD (n = 32).

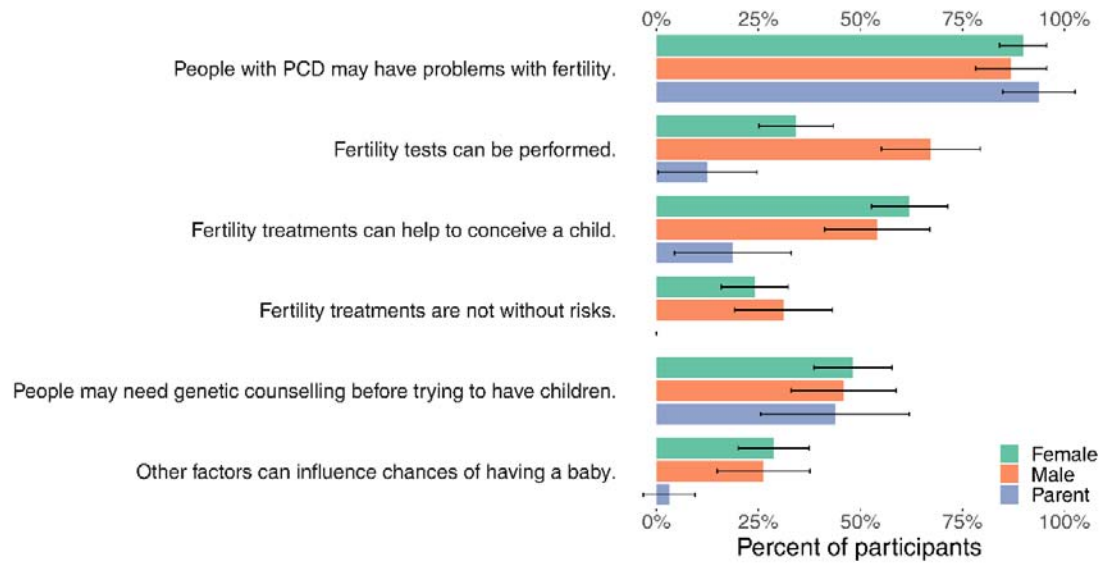

355 We excluded adolescents (n = 2) and missing values (male n = 1) from our analysis. Additional topics mentioned:  
356 ectopic pregnancy (n = 2), PCD does not affect female fertility (n = 1). Abbreviation: PCD, primary ciliary  
357 dyskinesia.  
358

359 **Figure 2:** Satisfaction with information provided by fertility specialists among females  
360 (n = 108), males (n = 60), and parents of children with PCD (n = 32) (COVID-PCD  
361 study).

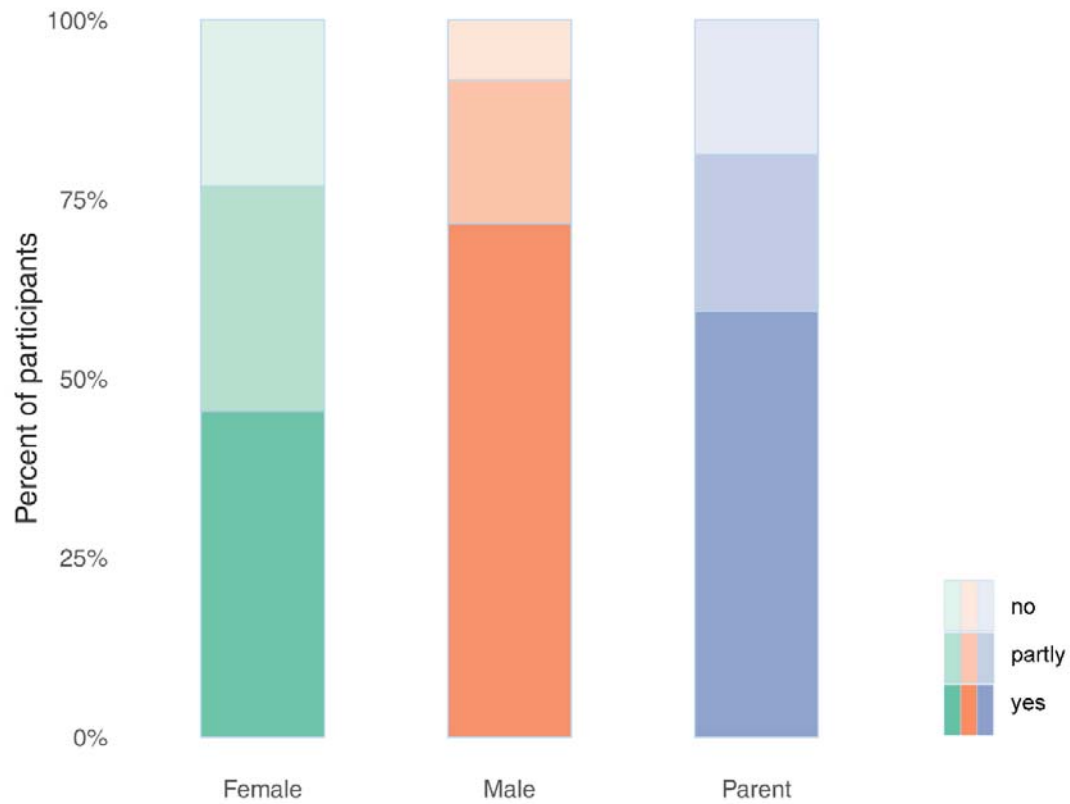

362  
363

364 We excluded adolescents (n = 2) and missing values (male n = 1) from our analyses. Abbreviation: PCD, primary  
365 ciliary dyskinesia.

366 **Table 4:** Fertility information gaps identified and other reasons for dissatisfaction  
 367 among people who discussed fertility care with healthcare professionals (n = 89)  
 368 (COVID-PCD study).

| <b>Participants who were dissatisfied with information about fertility from healthcare professionals (n = 89)</b> | n (%)   |
|-------------------------------------------------------------------------------------------------------------------|---------|
| <b>Fertility information gaps</b>                                                                                 |         |
| Detailed information about effects from PCD on fertility                                                          | 18 (20) |
| Specific information                                                                                              |         |
| – Effects of PCD on female fertility                                                                              | 8 (9)   |
| – Chances of pregnancy without medical assistance                                                                 | 5 (6)   |
| – Differences between fertility problems and sterility                                                            | 2 (2)   |
| – Risks of ectopic pregnancy                                                                                      | 2 (2)   |
| – Information about pregnancy and PCD                                                                             | 2 (2)   |
| – Risk of inherited PCD                                                                                           | 1 (1)   |
| – Associations of fertility with genetic defects                                                                  | 1 (1)   |
| Follow-up care                                                                                                    |         |
| – Information and advice on fertility treatments                                                                  | 9 (10)  |
| – Information on fertility tests                                                                                  | 2 (2)   |
| – Offering genetic counselling                                                                                    | 1 (1)   |
| – Follow-up care when ready for pregnancy                                                                         | 1 (1)   |
| – Sources of further information                                                                                  | 1 (1)   |
| – Support for adoption                                                                                            | 1 (1)   |
| <b>Other reasons for dissatisfaction</b>                                                                          |         |
| Physician knowledge of PCD and fertility                                                                          | 16 (18) |
| Fertility was not yet relevant because person diagnosed with PCD was young                                        | 8 (9)   |
| Little known about PCD at the time of the conversation                                                            | 5 (6)   |
| Emotional component, physician empathy                                                                            | 4 (4)   |
| PCD diagnosed after the conversation                                                                              | 2 (2)   |
| Lack of scientific evidence from studies                                                                          | 2 (2)   |
| Information about fertility not provided earlier                                                                  | 1 (1)   |

369 All characteristics are presented as n and column %. Abbreviation: PCD, primary ciliary dyskinesia.

## 370 References

- 371 1. Lyons RA, Saridogan E, Djahanbakhch O. The reproductive significance of human Fallopian  
372 tube cilia. *Hum Reprod Update*. 2006;12(4):363-372.
- 373 2. Aprea I, Nöthe-Menchen T, Dougherty GW, et al. Motility of efferent duct cilia aids passage  
374 of sperm cells through the male reproductive system. *Molecular human reproduction*.  
375 2021;27(3).
- 376 3. Sironen A, Shoemark A, Patel M, Loebinger MR, Mitchison HM. Sperm defects in primary  
377 ciliary dyskinesia and related causes of male infertility. *Cellular and molecular life sciences* :  
378 *CMLS*. 2020;77(11):2029-2048.
- 379 4. Raidt J, Werner C, Menchen T, et al. Ciliary function and motor protein composition of  
380 human fallopian tubes. *Hum Reprod*. 2015;30(12):2871-2880.
- 381 5. Goutaki M, Meier AB, Halbeisen FS, et al. Clinical manifestations in primary ciliary dyskinesia:  
382 systematic review and meta-analysis. *The European respiratory journal*. 2016;48(4):1081-  
383 1095.
- 384 6. Aprea I, Raidt J, Höben IM, et al. Defects in the cytoplasmic assembly of axonemal dynein  
385 arms cause morphological abnormalities and dysmotility in sperm cells leading to male  
386 infertility. *PLoS Genet*. 2021;17(2):e1009306.
- 387 7. Newman L, Chopra J, Dossett C, et al. The impact of primary ciliary dyskinesia on female and  
388 male fertility: a narrative review. *Hum Reprod Update*. 2023.
- 389 8. Zegers-Hochschild F, Adamson GD, Dyer S, et al. The International Glossary on Infertility and  
390 Fertility Care, 2017. *Fertility and sterility*. 2017;108(3):393-406.
- 391 9. Shapiro AJ, Zariwala MA, Ferkol T, et al. Diagnosis, monitoring, and treatment of primary  
392 ciliary dyskinesia: PCD foundation consensus recommendations based on state of the art  
393 review. *Pediatric pulmonology*. 2016;51(2):115-132.
- 394 10. Contarini M, Shoemark A, Rademacher J, et al. Why, when and how to investigate primary  
395 ciliary dyskinesia in adult patients with bronchiectasis. *Multidisciplinary respiratory  
396 medicine*. 2018;13(Suppl 1):26.
- 397 11. Hosie P, Fitzgerald DA, Jaffe A, Birman CS, Morgan L. Primary ciliary dyskinesia: overlooked  
398 and undertreated in children. *Journal of paediatrics and child health*. 2014;50(12):952-958.
- 399 12. Wallmeier J, Nielsen KG, Kuehni CE, et al. Motile ciliopathies. *Nature reviews Disease  
400 primers*. 2020;6(1):77.
- 401 13. Lucas JS, Alanin MC, Collins S, et al. Clinical care of children with primary ciliary dyskinesia.  
402 *Expert review of respiratory medicine*. 2017;11(10):779-790.
- 403 14. Werner C, Onnebrink JG, Omran H. Diagnosis and management of primary ciliary dyskinesia.  
404 *Cilia*. 2015;4(1):2.
- 405 15. Goutaki M, Shoemark A. Diagnosis of Primary Ciliary Dyskinesia. *Clinics in chest medicine*.  
406 2022;43(1):127-140.
- 407 16. Hailey CE, Tan JW, Dellon EP, Park EM. Pursuing parenthood with cystic fibrosis:  
408 Reproductive health and parenting concerns in individuals with cystic fibrosis. *Pediatric  
409 pulmonology*. 2019;54(8):1225-1233.
- 410 17. Kazmerski TM, Hill K, Prushinskaya O, et al. Perspectives of adolescent girls with cystic  
411 fibrosis and parents on disease-specific sexual and reproductive health education. *Pediatric  
412 pulmonology*. 2018;53(8):1027-1034.
- 413 18. Kazmerski TM, Gmelin T, Slocum B, Borrero S, Miller E. Attitudes and Decision Making  
414 Related to Pregnancy Among Young Women with Cystic Fibrosis. *Maternal and child health  
415 journal*. 2017;21(4):818-824.
- 416 19. Sawyer SM, Farrant B, Cerritelli B, Wilson J. A survey of sexual and reproductive health in  
417 men with cystic fibrosis: new challenges for adolescent and adult services. *Thorax*.  
418 2005;60(4):326-330.

- 419 20. Frayman KB, Cerritelli B, Wilson J, Sawyer SM. Reproductive and sexual health in boys with  
420 cystic fibrosis: what do parents know and say? *Pediatric pulmonology*. 2008;43(11):1107-  
421 1116.
- 422 21. West NE, Kazmerski TM, Taylor-Cousar JL, et al. Optimizing sexual and reproductive health  
423 across the lifespan in people with cystic fibrosis. *Pediatric pulmonology*. 2022;57 Suppl  
424 1(Suppl 1):S89-s100.
- 425 22. Pedersen ESL, Collaud ENR, Mozun R, et al. COVID-PCD: a participatory research study on the  
426 impact of COVID-19 in people with primary ciliary dyskinesia. *ERJ open research*. 2021;7(1).
- 427 23. von Elm E, Altman DG, Egger M, Pocock SJ, Gøtzsche PC, Vandenbroucke JP. The  
428 Strengthening the Reporting of Observational Studies in Epidemiology (STROBE) statement:  
429 guidelines for reporting observational studies. *J Clin Epidemiol*. 2008;61(4):344-349.
- 430 24. Harris PA, Taylor R, Thielke R, Payne J, Gonzalez N, Conde JG. Research electronic data  
431 capture (REDCap)--a metadata-driven methodology and workflow process for providing  
432 translational research informatics support. *Journal of biomedical informatics*.  
433 2009;42(2):377-381.
- 434 25. Optimizing natural fertility: a committee opinion. *Fertility and sterility*. 2022;117(1):53-63.
- 435 26. *R: A Language and Environment for Statistical Computing* [computer program]. R Foundation  
436 for Statistical Computing; 2010.
- 437 27. Jayasena CN, Sironen A. Diagnostics and Management of Male Infertility in Primary Ciliary  
438 Dyskinesia. *Diagnostics (Basel, Switzerland)*. 2021;11(9).
- 439 28. Jain R, Kazmerski TM, Zuckerman LC, et al. Pregnancy in cystic fibrosis: Review of the  
440 literature and expert recommendations. *J Cyst Fibros*. 2022;21(3):387-395.
- 441 29. Kazmerski TM, West NE, Jain R, et al. Family-building and parenting considerations for  
442 people with cystic fibrosis. *Pediatric pulmonology*. 2022;57 Suppl 1(Suppl 1):S75-s88.
- 443 30. Hughan KS, Daley T, Rayas MS, Kelly A, Roe A. Female reproductive health in cystic fibrosis. *J*  
444 *Cyst Fibros*. 2019;18 Suppl 2:S95-s104.
- 445 31. Frayman KB, Chin M, Sawyer SM, Bell SC. Sexual and reproductive health in cystic fibrosis.  
446 *Curr Opin Pulm Med*. 2020;26(6):685-695.
- 447 32. Meiss LN, Jain R, Kazmerski TM. Family Planning and Reproductive Health in Cystic Fibrosis.  
448 *Clinics in chest medicine*. 2022;43(4):811-820.

449

450



451 **Supplementary Material**

452 **Supplementary Table S1:** Formulation of questions from the English adult baseline  
 453 questionnaire and the English female and male fertility questionnaires from the  
 454 COVID-PCD study.

| <b>Question</b>                                                                                                       | <b>Answer category</b>                                                                                                                                                                                                                                       |
|-----------------------------------------------------------------------------------------------------------------------|--------------------------------------------------------------------------------------------------------------------------------------------------------------------------------------------------------------------------------------------------------------|
| <b>Baseline Questionnaire</b>                                                                                         |                                                                                                                                                                                                                                                              |
| What is your sex?                                                                                                     | Male; Female; Other                                                                                                                                                                                                                                          |
| Which year were you born?                                                                                             | <i>text (integer)</i>                                                                                                                                                                                                                                        |
| Which country do you live in?                                                                                         | List of all countries worldwide                                                                                                                                                                                                                              |
| Which other country?                                                                                                  | <i>text</i>                                                                                                                                                                                                                                                  |
| Which year were you diagnosed with PCD?                                                                               | <i>text (integer)</i>                                                                                                                                                                                                                                        |
| How old were you, when you were diagnosed with PCD?                                                                   | <i>text (integer)</i>                                                                                                                                                                                                                                        |
| <b>Fertility questionnaire</b>                                                                                        |                                                                                                                                                                                                                                                              |
| Have you ever searched for information about fertility in people with PCD?                                            | No; Yes                                                                                                                                                                                                                                                      |
| Where did you get your information from? (Tick all that apply)                                                        | Patient support groups;<br>Social media (e.g. Facebook, Twitter);<br>Websites from national or international PCD networks (e.g. BEAT-PCD);<br>Other websites;<br>Books;<br>Scientific articles;<br>Friends/family;<br>I asked my doctor;<br>Other            |
| Please specify where you got your information from                                                                    | <i>text</i>                                                                                                                                                                                                                                                  |
| Is fertility an important issue for you?                                                                              | No; Yes                                                                                                                                                                                                                                                      |
| Have you ever talked to a health care professional about fertility and fertility-related problems of people with PCD? | No; Yes                                                                                                                                                                                                                                                      |
| What topics were covered in your discussion with the health care professional? (Tick all that apply)                  | People with PCD may have problems with fertility.;<br>PCD is a genetic disease and people may need counselling before trying to have children (genetics counselling).;<br>Fertility tests can be performed.;;<br>Fertility treatments can help to conceive a |

|                                                                                                                                                   |                                                                                                                                                                                                                                   |
|---------------------------------------------------------------------------------------------------------------------------------------------------|-----------------------------------------------------------------------------------------------------------------------------------------------------------------------------------------------------------------------------------|
|                                                                                                                                                   | <p>child.;</p> <p>Fertility treatments are not without risks.;</p> <p>Other factors can influence chances of having a baby (e. g. timing of sexual intercourse, age, tobacco smoking).;</p> <p>Other</p>                          |
| Please specify what other topics were covered                                                                                                     | <i>text</i>                                                                                                                                                                                                                       |
| Were you satisfied with the information about fertility provided by the health care professional?                                                 | No; Partly; Yes                                                                                                                                                                                                                   |
| What information was missing?                                                                                                                     | <i>text</i>                                                                                                                                                                                                                       |
| In your opinion, should every person with PCD receive fertility counselling from a fertility expert (= a doctor who is specialized in fertility)? | <p>No;</p> <p>Yes, everybody;</p> <p>Yes, but only adults;</p> <p>Yes, but only if they want children;</p> <p>Yes, but only if they tried to get pregnant unsuccessfully;</p> <p>Yes, other</p>                                   |
| Please specify who should receive fertility counselling                                                                                           | <i>text</i>                                                                                                                                                                                                                       |
| Have you ever seen a fertility expert (= a doctor who is specialized in fertility)?                                                               | <p>No;</p> <p>No, but I have an appointment / I am waiting to be referred;</p> <p>No, but I would like to;</p> <p>Yes</p>                                                                                                         |
| How old were you when you first saw a fertility expert? If you cannot remember the exact age, please give an approximate age.                     | <i>text (integer)</i>                                                                                                                                                                                                             |
| Who referred you to the fertility expert?                                                                                                         | <p>I was referred by my PCD physician.;</p> <p>I was referred by a doctor other than my PCD physician (e.g. my general practitioner).;</p> <p>I had to ask for a referral.;</p> <p>I had to organize it myself.;</p> <p>Other</p> |
| Please specify who referred you to the fertility expert                                                                                           | <i>text</i>                                                                                                                                                                                                                       |
| <p>Have you ever tried to become pregnant?</p> <p>Have you ever tried to father a child?</p>                                                      | <p>No;</p> <p>Yes, but it did not work / we are still trying;</p> <p>Yes, it worked</p>                                                                                                                                           |

455

456

457 **Supplementary Table S2:** Countries of residence of COVID-PCD participants with  
458 fewer than 25 enrolled participants who completed the fertility questionnaire,  
459 grouped as either “other European countries” or “other non-European countries”.

| <b>Country</b>                      | <b>Number of participants</b> |
|-------------------------------------|-------------------------------|
| <b>Other European countries</b>     | <b>67</b>                     |
| Austria                             | 4                             |
| Belgium                             | 6                             |
| Croatia                             | 1                             |
| Cyprus                              | 2                             |
| Czech Republic                      | 1                             |
| Denmark                             | 5                             |
| Georgia                             | 2                             |
| Greece                              | 1                             |
| Hungary                             | 1                             |
| Ireland                             | 7                             |
| Jersey                              | 1                             |
| Netherlands                         | 12                            |
| Norway                              | 8                             |
| Poland                              | 3                             |
| Portugal                            | 2                             |
| Spain                               | 8                             |
| Sweden                              | 3                             |
| <b>Other non-European countries</b> | <b>9</b>                      |
| Brazil                              | 1                             |
| Cameroon                            | 1                             |
| Hong Kong                           | 1                             |
| Israel                              | 2                             |
| Panama                              | 1                             |
| Puerto Rico                         | 1                             |
| Saudi Arabia                        | 1                             |
| South Africa                        | 1                             |

460

461 **Supplementary Table S3:** Characteristics of participants who did or did not  
 462 complete the fertility questionnaire (n = 723).

|                                  | <b>Completed<br/>questionnaire</b> | <b>Not completed<br/>questionnaire</b> |
|----------------------------------|------------------------------------|----------------------------------------|
|                                  | <b>n (%)</b>                       | <b>n (%)</b>                           |
|                                  | <b>n = 384</b>                     | <b>n = 339</b>                         |
| <b>Questionnaire groups</b>      |                                    |                                        |
| Adults                           | 266 (55)                           | 216 (45)                               |
| Adolescents                      | 16 (48)                            | 17 (52)                                |
| Parents                          | 102 (49)                           | 106 (51)                               |
| <b>Age at survey</b>             |                                    |                                        |
| Adults, median (IQR; range)      | 44 (33-54; 19-87)                  | 36 (26-47; 19-76)                      |
| 18-30 y                          | 48 (38)                            | 79 (62)                                |
| 31-45 y                          | 100 (56)                           | 78 (44)                                |
| > 45 y                           | 118 (67)                           | 59 (33)                                |
| Adolescents, median (IQR; range) | 17 (16-17; 15-18)                  | 17 (17-18; 16-18)                      |
| Children, median (IQR; range)    | 9 (6-13; 2-15)                     | 9 (7-12; 3-15)                         |
| <b>Sex, adults</b>               |                                    |                                        |
| Female                           | 181 (56)                           | 141 (44)                               |
| Male                             | 85 (54)                            | 73 (46)                                |
| Other                            | 0 (0)                              | 2 (100)                                |
| <b>Countries</b>                 |                                    |                                        |
| North America                    | 71 (46)                            | 85 (54)                                |
| United Kingdom                   | 66 (45)                            | 80 (55)                                |
| Germany                          | 62 (63)                            | 37 (37)                                |
| Switzerland                      | 36 (78)                            | 10 (22)                                |
| Italy                            | 29 (57)                            | 22 (43)                                |
| France                           | 23 (53)                            | 20 (47)                                |
| Australia                        | 21 (64)                            | 12 (36)                                |
| Other European countries         | 67 (61)                            | 43 (39)                                |
| Other countries                  | 9 (23)                             | 30 (77)                                |

463 All characteristics are presented as n and row %, unless otherwise stated. Abbreviations: IQR, interquartile  
 464 range. y, years.

465
